# Supplementary material for: Biomarker Prioritisation and Power Estimation Using Ensemble Gene Regulatory Network Inference
Source: PubMed Central journal article supplement (PMC7660606; doi:10.3390/ijms21217886), 2020-10-23
Supplement: ijms-21-07886-s001.pdf [file ijms-21-07886-s001.pdf]

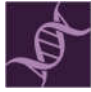

International Journal of  
*Molecular Sciences*

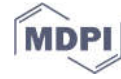

*Article*

# **Biomarker Prioritisation and Power Estimation Using Ensemble Gene Regulatory Network Inference**

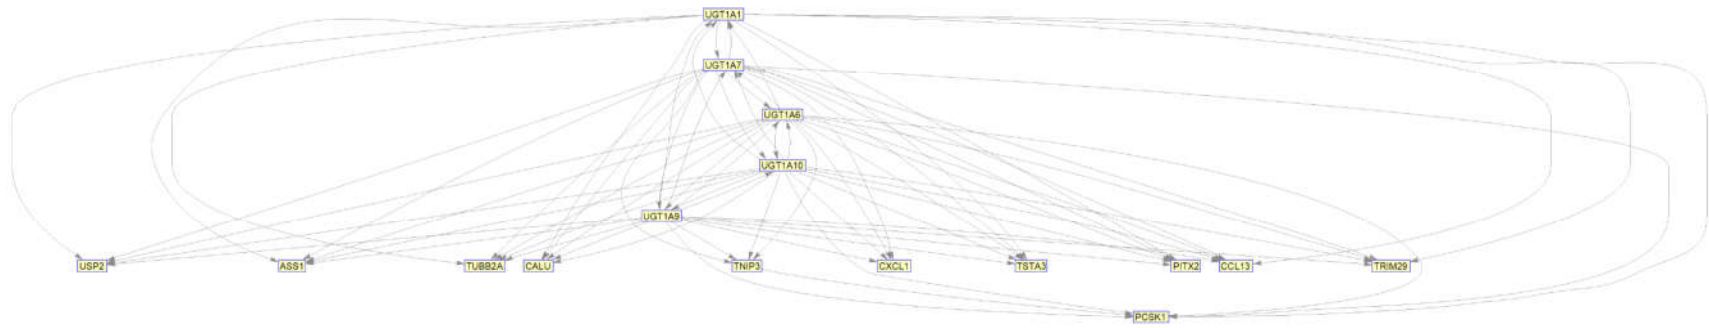

**Figure S1.** GRN generated from the application of PLSNET on the IBD dataset. The threshold value is selected in such a way that the top 30% edges are selected. UGT genes are delineating as regulators for other genes.

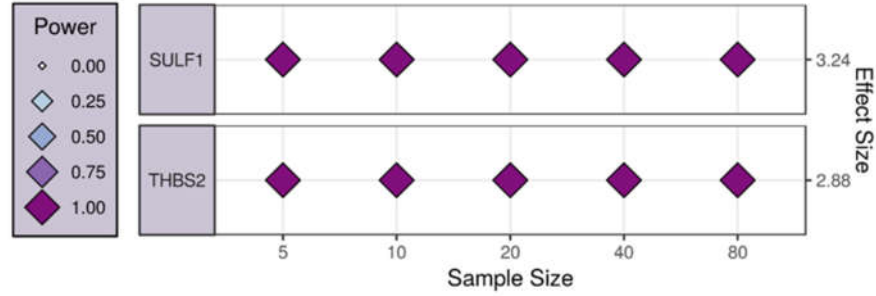

**Figure S2.** The two identified regulators are represented by the largest observed effect size. The effect size of each assessed variable is shown along the y axis and a series of sample sizes along the x axis.

**Table S1.** Distribution of the posteriors versus observed experimental states for GSE15471.

| Genes           | Predicted Marginals |        | Observed States |        |
|-----------------|---------------------|--------|-----------------|--------|
|                 | 0                   | 1      | 0               | 1      |
| <i>SULF1</i>    | 0.6026              | 0.3974 | 0.6026          | 0.3974 |
| <i>COL8A1</i>   | 0.4103              | 0.5897 | 0.4103          | 0.5897 |
| <i>INHBA</i>    | 0.6026              | 0.3974 | 0.6026          | 0.3974 |
| <i>FN1</i>      | 0.6026              | 0.3974 | 0.6026          | 0.3974 |
| <i>COL10A1</i>  | 0.5637              | 0.4363 | 0.5641          | 0.4359 |
| <i>THBS2</i>    | 0.5641              | 0.4359 | 0.5641          | 0.4359 |
| <i>NTM</i>      | 0.6021              | 0.3979 | 0.6026          | 0.3974 |
| <i>NOX4</i>     | 0.3846              | 0.6154 | 0.3846          | 0.6154 |
| <i>RASAL2</i>   | 0.5385              | 0.4615 | 0.5385          | 0.4615 |
| <i>ADAMTS12</i> | 0.5769              | 0.4231 | 0.5769          | 0.4231 |
| <i>CAPG</i>     | 0.6667              | 0.3333 | 0.6667          | 0.3333 |
| <i>LTBP1</i>    | 0.6538              | 0.3462 | 0.6538          | 0.3462 |
| <i>CTHRC1</i>   | 0.5128              | 0.4872 | 0.5128          | 0.4872 |
| <i>FAP</i>      | 0.5769              | 0.4231 | 0.5769          | 0.4231 |
| <i>WISP1</i>    | 0.6538              | 0.3462 | 0.6538          | 0.3462 |
| <i>VCAN</i>     | 0.4235              | 0.5765 | 0.4231          | 0.5769 |
| <i>TIMP1</i>    | 0.5641              | 0.4359 | 0.5641          | 0.4359 |
| <i>MIR34AHG</i> | 0.8462              | 0.1538 | 0.8462          | 0.1538 |
| <i>SLPI</i>     | 0.5513              | 0.4487 | 0.5513          | 0.4487 |
| <i>GPRC5A</i>   | 0.6406              | 0.3594 | 0.641           | 0.359  |

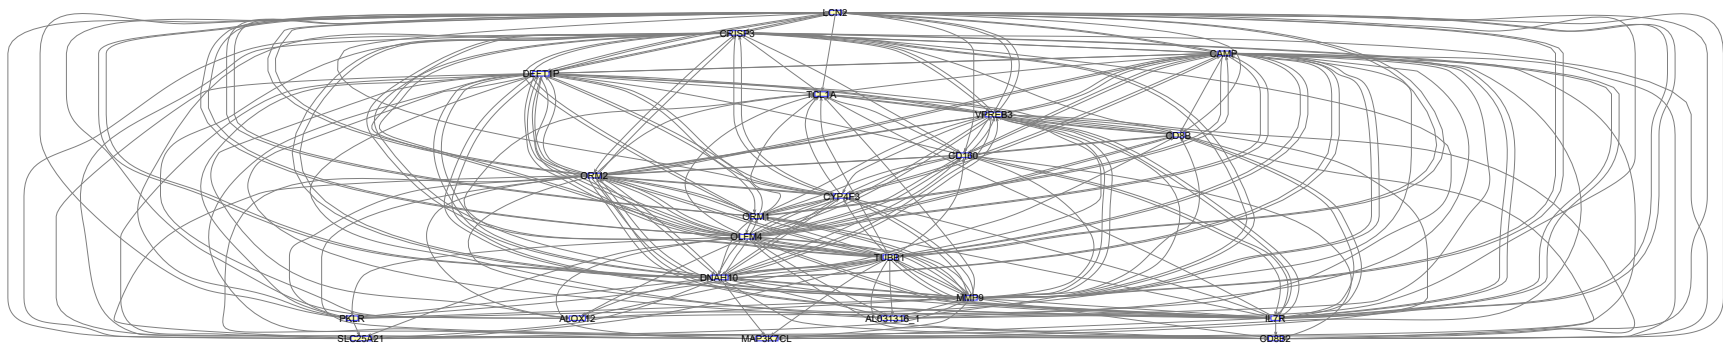

**Figure S3.** GRN generated using PLSNET for AML. The threshold value is selected in such a way that the top 10% of all edges are selected. This figure does not show Table 22. genes that do not have any interactions. These genes include *HHEX*, *KLF10*, *SOX4*, *MAPK12*, *TRIO*, *GAS5*, *SOCS5*, *MARK4*, *ZNF469*, *EEF1A1*, *C6orf48*, *ASPH*, *SLC17A9*, *RPL22*, *RAB37*, *FBXL19*, *RTN2*, *MSRB3*, *C5*, *SNX33*, *FLT3*, *MERTK*, *CD44*, *ITPR1*, *CRTC1*, *IGF2BP2*, *URB1\\_AS1*, and 'ARRDC4'.



|                    |   |    |    |   |    |    |   |    |    |   |    |    |   |    |    |
|--------------------|---|----|----|---|----|----|---|----|----|---|----|----|---|----|----|
| <i>MSRB3</i>       | 0 | 0  | 0  | 0 | 0  | 0  | 0 | 0  | 0  | 0 | 0  | 0  | 0 | 0  |    |
| <i>C5</i>          | 0 | 0  | 0  | 0 | 0  | 0  | 0 | 0  | 0  | 0 | 0  | 0  | 0 | 0  |    |
| <i>CFD</i>         | 0 | 0  | 0  | 0 | 0  | 0  | 2 | 0  | 0  | 2 | 0  | 0  | 2 | 0  |    |
| <i>ORM2</i>        | 0 | 43 | 57 | 0 | 14 | 86 | 0 | 6  | 94 | 0 | 6  | 94 | 0 | 6  | 94 |
| <i>SNX33</i>       | 0 | 0  | 0  | 0 | 0  | 0  | 0 | 0  | 0  | 0 | 0  | 0  | 0 | 0  | 0  |
| <i>FLT3</i>        | 0 | 0  | 0  | 0 | 0  | 0  | 0 | 0  | 0  | 0 | 0  | 0  | 0 | 0  | 0  |
| <i>AL022313\_1</i> | 0 | 0  | 0  | 0 | 1  | 0  | 0 | 4  | 0  | 0 | 4  | 0  | 0 | 4  | 0  |
| <i>MERTK</i>       | 0 | 0  | 0  | 0 | 0  | 0  | 0 | 0  | 0  | 0 | 0  | 0  | 0 | 0  | 0  |
| <i>CD160</i>       | 4 | 65 | 26 | 0 | 24 | 76 | 0 | 8  | 92 | 0 | 8  | 92 | 0 | 8  | 92 |
| <i>ALOX12</i>      | 0 | 75 | 0  | 0 | 92 | 8  | 0 | 70 | 30 | 0 | 70 | 30 | 0 | 70 | 30 |
| <i>PKLR</i>        | 2 | 78 | 8  | 0 | 46 | 54 | 0 | 19 | 81 | 0 | 19 | 81 | 0 | 19 | 81 |
| <i>CD44</i>        | 0 | 0  | 0  | 0 | 0  | 0  | 0 | 0  | 0  | 0 | 0  | 0  | 0 | 0  | 0  |
| <i>CD8B</i>        | 7 | 49 | 31 | 0 | 23 | 77 | 0 | 5  | 95 | 0 | 5  | 95 | 0 | 5  | 95 |
| <i>TCL1A</i>       | 0 | 77 | 23 | 0 | 36 | 64 | 0 | 11 | 89 | 0 | 11 | 89 | 0 | 11 | 89 |
| <i>ITPR1</i>       | 0 | 0  | 0  | 0 | 0  | 0  | 0 | 0  | 0  | 0 | 0  | 0  | 0 | 0  | 0  |
| <i>AL031316\_1</i> | 0 | 97 | 3  | 0 | 72 | 28 | 0 | 43 | 57 | 0 | 43 | 57 | 0 | 43 | 57 |
| <i>CRTC1</i>       | 0 | 0  | 0  | 0 | 0  | 0  | 0 | 0  | 0  | 0 | 0  | 0  | 0 | 0  | 0  |
| <i>IGF2BP2</i>     | 0 | 0  | 0  | 0 | 0  | 0  | 0 | 0  | 0  | 0 | 0  | 0  | 0 | 0  | 0  |
| <i>URB1\_AS1</i>   | 0 | 0  | 0  | 0 | 0  | 0  | 0 | 0  | 0  | 0 | 0  | 0  | 0 | 0  | 0  |
| <i>SLC25A21</i>    | 0 | 99 | 0  | 0 | 91 | 9  | 0 | 78 | 22 | 0 | 78 | 22 | 0 | 78 | 22 |
| <i>ARRDC4</i>      | 0 | 0  | 0  | 0 | 0  | 0  | 0 | 0  | 0  | 0 | 0  | 0  | 0 | 0  | 0  |

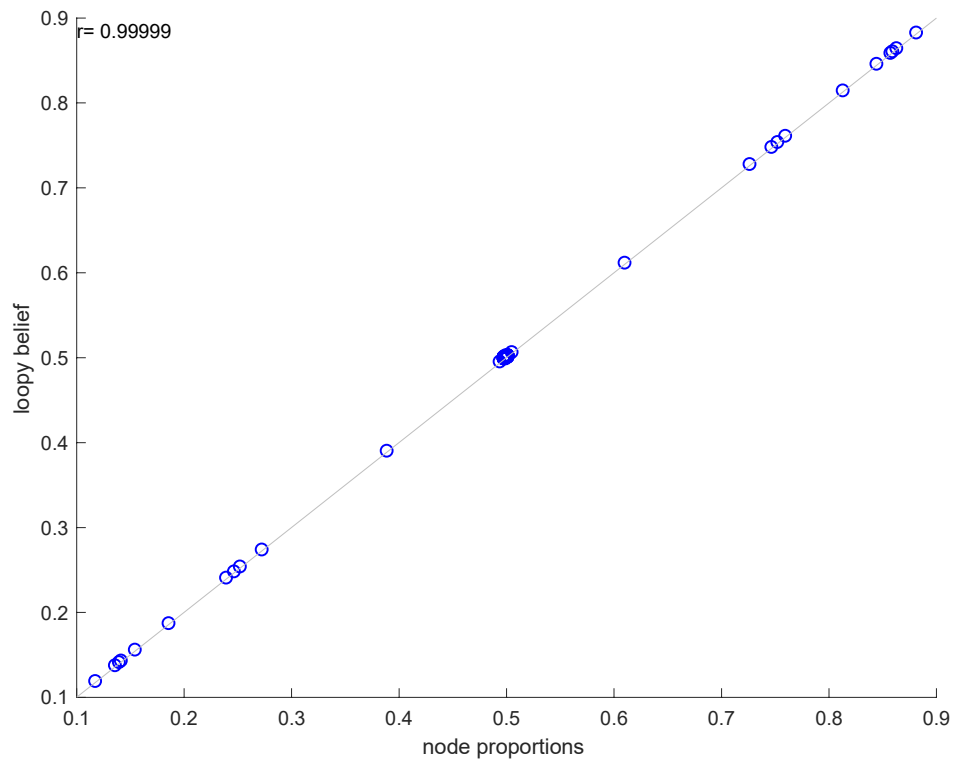

**Figure S4.** Pearson correlation plots for the AML dataset.

**Table S3.** Distribution of the posteriors versus observed experimental states in the AML dataset.

| <b>Genes</b>    | <b>Predicted Marginals</b> |          | <b>Observed States</b> |          |
|-----------------|----------------------------|----------|------------------------|----------|
|                 | <b>0</b>                   | <b>1</b> | <b>0</b>               | <b>1</b> |
| <i>LCN2</i>     | 0.5                        | 0.5      | 0.5                    | 0.5      |
| <i>HHEX</i>     | 0.5                        | 0.5      | 0.4982                 | 0.5018   |
| <i>CRISP3</i>   | 0.5                        | 0.5      | 0.5                    | 0.5      |
| <i>CAMP</i>     | 0.5                        | 0.5      | 0.5                    | 0.5      |
| <i>KLF10</i>    | 0.5                        | 0.5      | 0.5                    | 0.5      |
| <i>SOX4</i>     | 0.5                        | 0.5      | 0.5                    | 0.5      |
| <i>HOXA9</i>    | 0.5                        | 0.5      | 0.5                    | 0.5      |
| <i>MAP3K7CL</i> | 0.1863                     | 0.8137   | 0.1863                 | 0.8137   |
| <i>MAPK12</i>   | 0.5                        | 0.5      | 0.5                    | 0.5      |
| <i>TRIO</i>     | 0.5                        | 0.5      | 0.5                    | 0.5      |
| <i>DEFT1P</i>   | 0.2731                     | 0.7269   | 0.2731                 | 0.7269   |
| <i>GAS5</i>     | 0.5                        | 0.5      | 0.5                    | 0.5      |
| <i>BMP1</i>     | 0.5                        | 0.5      | 0.5                    | 0.5      |
| <i>CD8B2</i>    | 0.8596                     | 0.1404   | 0.8598                 | 0.1402   |
| <i>SOCS5</i>    | 0.5                        | 0.5      | 0.4982                 | 0.5018   |
| <i>PTH2R</i>    | 0.5                        | 0.5      | 0.5                    | 0.5      |
| <i>MARK4</i>    | 0.5                        | 0.5      | 0.5                    | 0.5      |
| <i>FSCN1</i>    | 0.5                        | 0.5      | 0.5                    | 0.5      |
| <i>CYP4F3</i>   | 0.5                        | 0.5      | 0.5                    | 0.5      |
| <i>ZNF469</i>   | 0.5                        | 0.5      | 0.5                    | 0.5      |
| <i>DNAH10</i>   | 0.2472                     | 0.7528   | 0.2472                 | 0.7528   |
| <i>HOXA10</i>   | 0.5                        | 0.5      | 0.5                    | 0.5      |
| <i>VPREB3</i>   | 0.1551                     | 0.8449   | 0.155                  | 0.845    |
| <i>EEF1A1</i>   | 0.5                        | 0.5      | 0.5                    | 0.5      |
| <i>C6orf48</i>  | 0.5018                     | 0.4982   | 0.5018                 | 0.4982   |
| <i>ASPH</i>     | 0.5                        | 0.5      | 0.5                    | 0.5      |
| <i>MMP9</i>     | 0.5                        | 0.5      | 0.5                    | 0.5      |
| <i>SLC17A9</i>  | 0.5                        | 0.5      | 0.5                    | 0.5      |
| <i>UBE2E2</i>   | 0.5                        | 0.5      | 0.5                    | 0.5      |
| <i>RPL22</i>    | 0.5                        | 0.5      | 0.5                    | 0.5      |
| <i>NETO2</i>    | 0.5                        | 0.5      | 0.5                    | 0.5      |
| <i>OLFM4</i>    | 0.6107                     | 0.3893   | 0.6107                 | 0.3893   |
| <i>IL7R</i>     | 0.7471                     | 0.2529   | 0.7472                 | 0.2528   |
| <i>PNKD</i>     | 0.5                        | 0.5      | 0.5                    | 0.5      |
| <i>ORM1</i>     | 0.5                        | 0.5      | 0.5                    | 0.5      |
| <i>RAB37</i>    | 0.5                        | 0.5      | 0.5                    | 0.5      |
| <i>TUBB1</i>    | 0.5                        | 0.5      | 0.5                    | 0.5      |
| <i>FBXL19</i>   | 0.5                        | 0.5      | 0.5                    | 0.5      |
| <i>RTN2</i>     | 0.5                        | 0.5      | 0.5                    | 0.5      |
| <i>MSRB3</i>    | 0.4945                     | 0.5055   | 0.4945                 | 0.5055   |

|                    |        |        |        |        |
|--------------------|--------|--------|--------|--------|
| <i>C5</i>          | 0.4982 | 0.5018 | 0.4982 | 0.5018 |
| <i>CFD</i>         | 0.5    | 0.5    | 0.5    | 0.5    |
| <i>ORM2</i>        | 0.7601 | 0.2399 | 0.7601 | 0.2399 |
| <i>SNX33</i>       | 0.5    | 0.5    | 0.5    | 0.5    |
| <i>FLT3</i>        | 0.5    | 0.5    | 0.5    | 0.5    |
| <i>AL022313\_1</i> | 0.5018 | 0.4982 | 0.5    | 0.5    |
| <i>MERTK</i>       | 0.5018 | 0.4982 | 0.5018 | 0.4982 |
| <i>CD160</i>       | 0.1367 | 0.8633 | 0.1365 | 0.8635 |
| <i>ALOX12</i>      | 0.5    | 0.5    | 0.5    | 0.5    |
| <i>PKLR</i>        | 0.5    | 0.5    | 0.5    | 0.5    |
| <i>CD44</i>        | 0.5    | 0.5    | 0.5    | 0.5    |
| <i>CD8B</i>        | 0.1422 | 0.8578 | 0.1421 | 0.8579 |
| <i>TCL1A</i>       | 0.8818 | 0.1182 | 0.8819 | 0.1181 |
| <i>ITPR1</i>       | 0.5    | 0.5    | 0.5    | 0.5    |
| <i>AL031316\_1</i> | 0.5    | 0.5    | 0.5    | 0.5    |
| <i>CRTC1</i>       | 0.5    | 0.5    | 0.5    | 0.5    |
| <i>IGF2BP2</i>     | 0.4982 | 0.5018 | 0.4982 | 0.5018 |
| <i>URB1\_AS1</i>   | 0.5018 | 0.4982 | 0.5018 | 0.4982 |
| <i>SLC25A21</i>    | 0.5    | 0.5    | 0.5    | 0.5    |
| <i>ARRDC4</i>      | 0.5    | 0.5    | 0.5    | 0.5    |

**Table S4.** Frequencies of different genes appearing as Regulatory (R), Target (T), or Intermediate (I) genes for different threshold values in the DREAM4 dataset.

| Genes      | Top 2% |    |   | Top 5% |     |    | Top 10% |     |     | Top 15% |     |     | Top 20% |     |     |
|------------|--------|----|---|--------|-----|----|---------|-----|-----|---------|-----|-----|---------|-----|-----|
|            | R      | T  | I | R      | T   | I  | R       | T   | I   | R       | T   | I   | R       | T   | I   |
| <i>G1</i>  | 0      | 0  | 0 | 8      | 21  | 1  | 1       | 0   | 99  | 0       | 0   | 100 | 0       | 0   | 100 |
| <i>G2</i>  | 0      | 0  | 0 | 0      | 0   | 0  | 0       | 69  | 0   | 0       | 100 | 0   | 0       | 100 | 0   |
| <i>G3</i>  | 0      | 0  | 0 | 0      | 0   | 0  | 0       | 88  | 0   | 0       | 99  | 0   | 0       | 100 | 0   |
| <i>G4</i>  | 0      | 0  | 0 | 0      | 0   | 0  | 0       | 29  | 0   | 0       | 99  | 0   | 0       | 100 | 0   |
| <i>G5</i>  | 0      | 0  | 0 | 21     | 8   | 1  | 0       | 1   | 99  | 0       | 0   | 100 | 0       | 0   | 100 |
| <i>G6</i>  | 1      | 3  | 0 | 2      | 8   | 90 | 0       | 0   | 100 | 0       | 0   | 100 | 0       | 0   | 100 |
| <i>G7</i>  | 0      | 0  | 0 | 0      | 79  | 0  | 0       | 100 | 0   | 0       | 100 | 0   | 0       | 92  | 8   |
| <i>G8</i>  | 3      | 1  | 0 | 8      | 2   | 90 | 0       | 0   | 100 | 0       | 0   | 100 | 0       | 0   | 100 |
| <i>G9</i>  | 98     | 0  | 0 | 100    | 0   | 0  | 100     | 0   | 0   | 100     | 0   | 0   | 82      | 0   | 18  |
| <i>G10</i> | 0      | 96 | 0 | 0      | 100 | 0  | 0       | 100 | 0   | 0       | 100 | 0   | 0       | 100 | 0   |



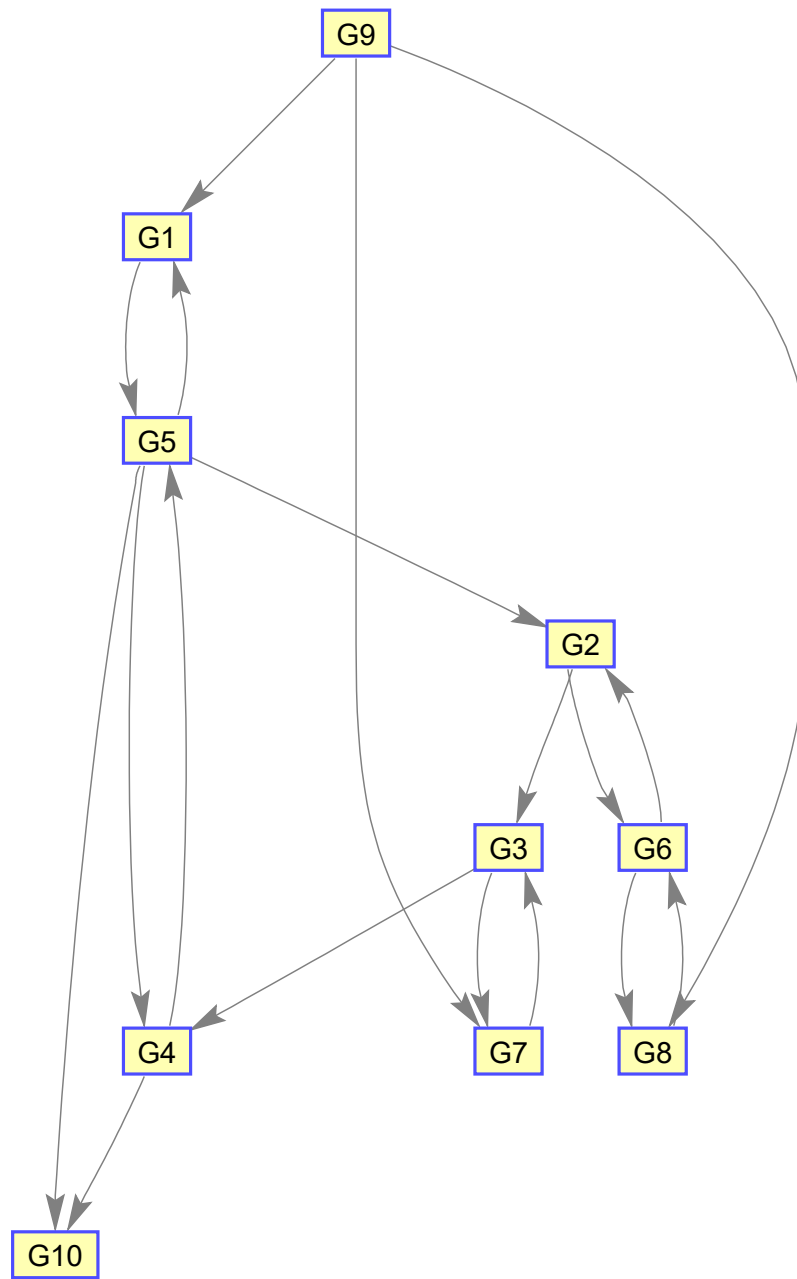

**Figure S5.** GRN generated from the application of MIDER on the DREAM dataset.

**Table S5.** Distribution of the posteriors versus observed experimental states for DREAM4.

| Genes      | Predicted Marginals |        | Observed States |        |
|------------|---------------------|--------|-----------------|--------|
|            | 0                   | 1      | 0               | 1      |
| <i>G1</i>  | 0.6026              | 0.3974 | 0.6026          | 0.3974 |
| <i>G2</i>  | 0.4103              | 0.5897 | 0.4103          | 0.5897 |
| <i>G3</i>  | 0.6026              | 0.3974 | 0.6026          | 0.3974 |
| <i>G4</i>  | 0.6026              | 0.3974 | 0.6026          | 0.3974 |
| <i>G5</i>  | 0.5637              | 0.4363 | 0.5641          | 0.4359 |
| <i>G6</i>  | 0.5641              | 0.4359 | 0.5641          | 0.4359 |
| <i>G7</i>  | 0.6021              | 0.3979 | 0.6026          | 0.3974 |
| <i>G8</i>  | 0.3846              | 0.6154 | 0.3846          | 0.6154 |
| <i>G9</i>  | 0.5385              | 0.4615 | 0.5385          | 0.4615 |
| <i>G10</i> | 0.5769              | 0.4231 | 0.5769          | 0.4231 |

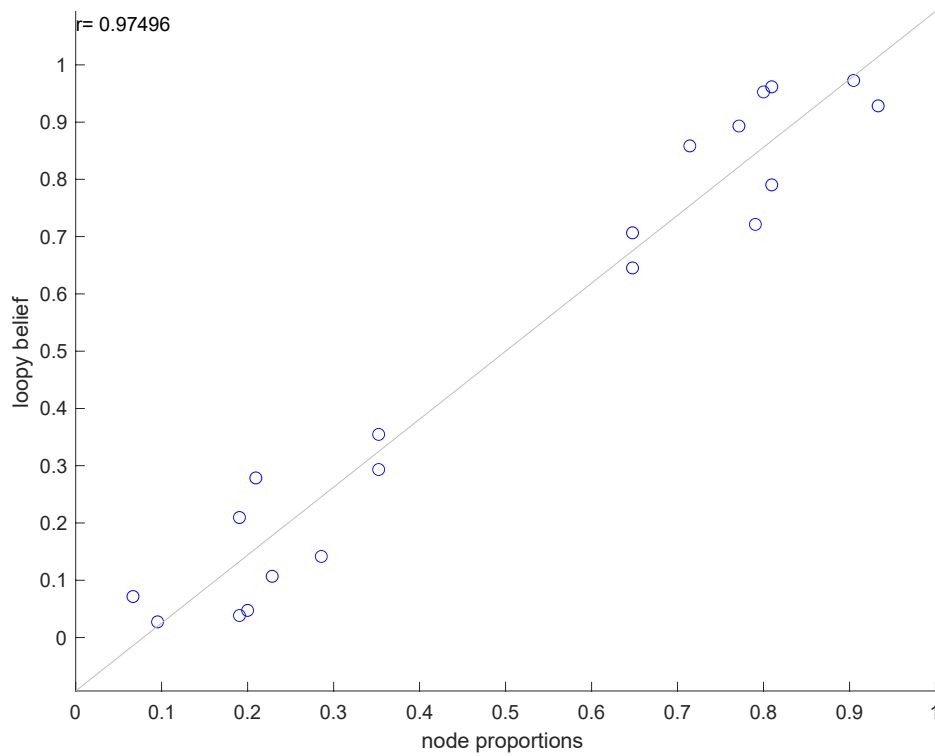

**Figure S6.** Pearson correlation plots for the DREAM4.

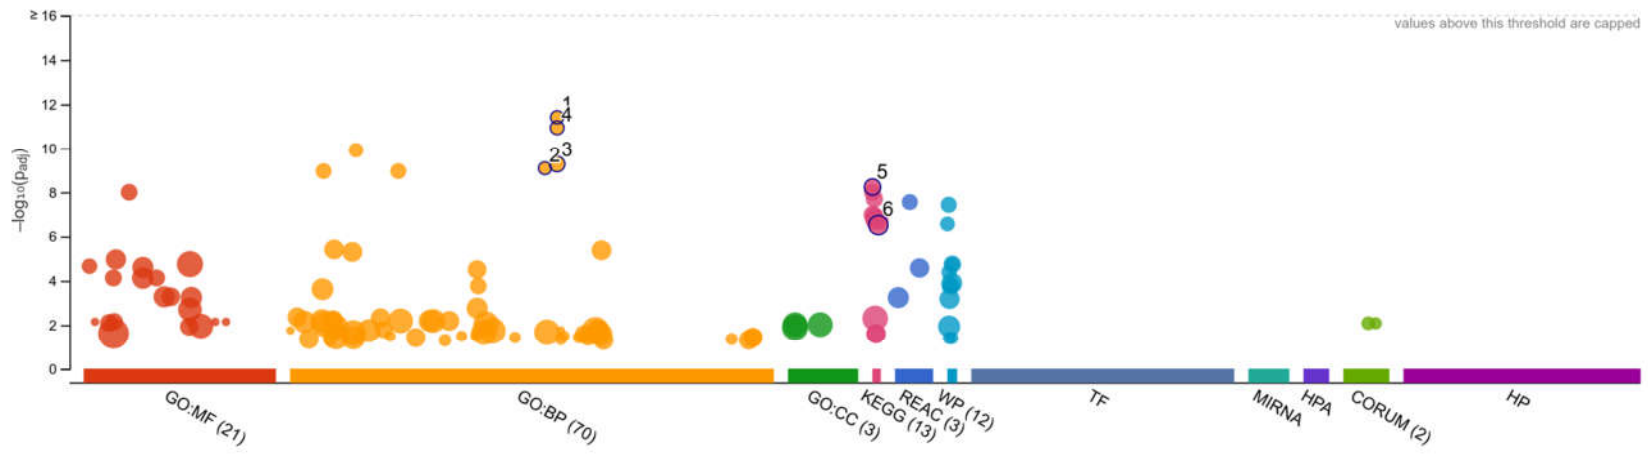

| ID | Source | Term ID    | Term Name                         | Padj (query_1)          |
|----|--------|------------|-----------------------------------|-------------------------|
| 1  | GO:BP  | GO:0052696 | flavonoid glucuronidation         | $3.862 \times 10^{-12}$ |
| 2  | GO:BP  | GO:0051552 | flavone metabolic process         | $8.236 \times 10^{-10}$ |
| 3  | GO:BP  | GO:0052695 | cellular glucuronidation          | $5.314 \times 10^{-10}$ |
| 4  | GO:BP  | GO:0052697 | xenobiotic glucuronidation        | $1.158 \times 10^{-11}$ |
| 5  | KEGG   | KEGG:00053 | Ascorbate and aldarate metabolism | $5.858 \times 10^{-9}$  |
| 6  | KEGG   | KEGG:04976 | Bile secretion                    | $3.061 \times 10^{-7}$  |

**version** e100\_eg47\_p14\_7733820  
**date** 24/09/2020, 12:48:08  
**organism** hsapiens

g:Profiler

**Figure S7.** Gene set enrichment results from the IBD dataset. Genes were entered into the gProfiler database. P values are FDR adjusted. GO:BP = biological process, KEGG = Kyoto Encyclopedia of Genes and Genomes database.

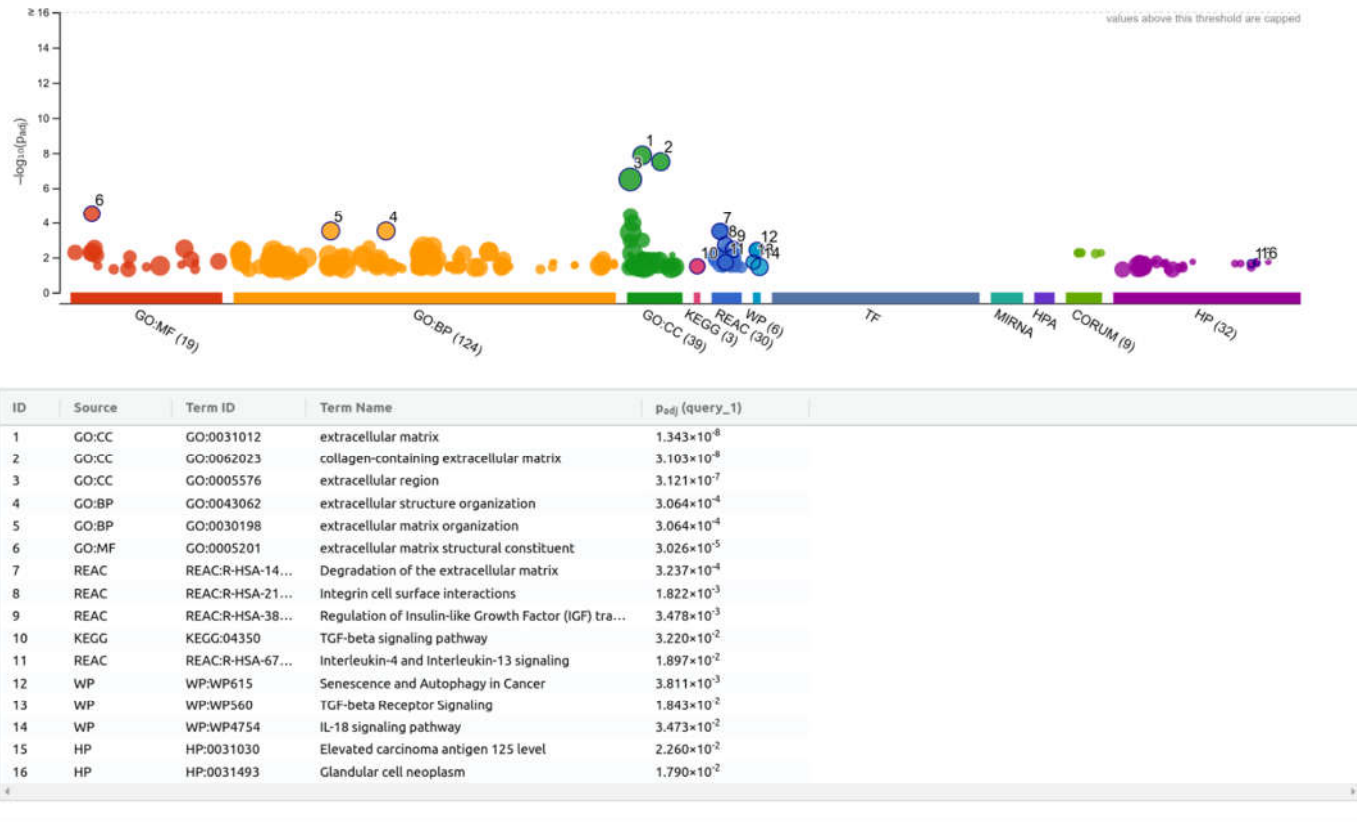

version e100\_eg47\_p14\_7733820  
 date 23/09/2020, 16:24:50  
 organism hsapiens

g:Profiler

**Figure S8.** Gene set enrichment results from the PDAC dataset. Genes were entered into the gProfiler database. *p* values are FDR adjusted. GO:BP = biological process, GO:CC = cellular component, REAC = Reactome database, WP = WikiPathways, HP = Human Phenotype Ontology, KEGG = Kyoto Encyclopedia of Genes and Genomes database.
